# Supplementary material
Source: publisher figshare collection journal article supplement (https://acs.figshare.com/ndownloader/files/13087397)
Supplement: Supplementary file 1 [file 13087397]

# **Polyurethane microparticles for stimuli response and reduced oxidative degradation in highly porous shape memory polymers**

AC Weems<sup>1\*</sup>, W Li<sup>2</sup>, DJ Maitland<sup>1</sup>, LM Calle<sup>2</sup>

1. Department of Biomedical Engineering, Texas A&M University, College Station, TX, 77840
2. Corrosion Technology Laboratory, NASA, Kennedy Space Center, FL, 32899

Corresponding email: [a.c.weems@bham.ac.uk](mailto:a.c.weems@bham.ac.uk)

## SUPPLEMENTAL MATERIALS

### Table of Contents:

|                                                  |    |
|--------------------------------------------------|----|
| Antioxidants and Model Reaction                  | 3  |
| Microparticle Synthesis and Characterization     | 4  |
| Composite SMP Synthesis: Spectroscopy            | 7  |
| Composite SMP Synthesis: Microscopy              | 11 |
| Composite SMP Synthesis: Thermoechanical Testing | 12 |
| Composite SMP Synthesis: Release Studies         | 13 |
| Composite SMP Synthesis: Gravimetric Studies     | 14 |

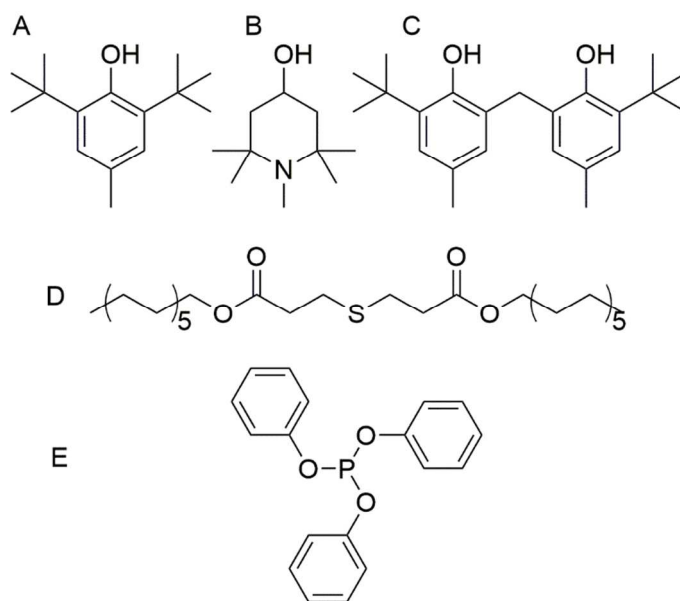

| Species        | Starting Material (%) at conclusion | Urethane formation (%) | Urea formation (%) |
|----------------|-------------------------------------|------------------------|--------------------|
| Control (EtOH) | 3.7                                 | 70.2                   | 26.1               |
| Piper          | 45.7                                | 31.7                   | 22.6               |
| Methyl         | 32.8                                | 28.0 (19.5)*           | 19.5               |
| BHT            | 100                                 | 0                      | ~100               |
| Thio           | 100                                 | 0                      | ~100               |
| Triphen        | 100                                 | 0                      | ~100               |

**SI Figure 1.** Antioxidant structures used to synthesize oxidatively stable porous SMPs. (A) butylated hydroxytoluene, (B) 2,2,6,6 tetramethyl piperidinol, (C) 2,2'-methylenebis(6-tert-butyl-methylphenol), (D) didodecyl 3,3' thiodipropionate, (E) triphenyl phosphite, and their reactions with hexyl isocyanate in model compound studies with quantified urethane and urea concentrations determined. \* denotes where two urethane linkages were formed as determined by LCMS.

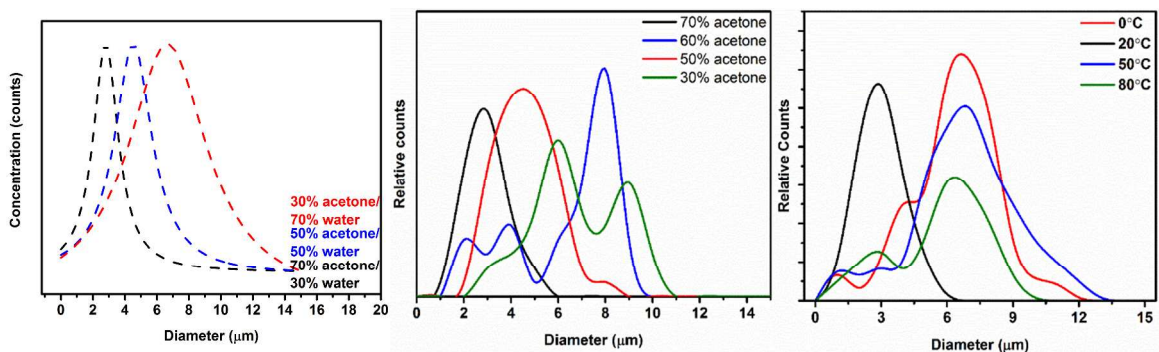

**SI Figure 2.** Size distribution of IPDI TEA particles synthesized at varied solvent percentages and solution temperatures.

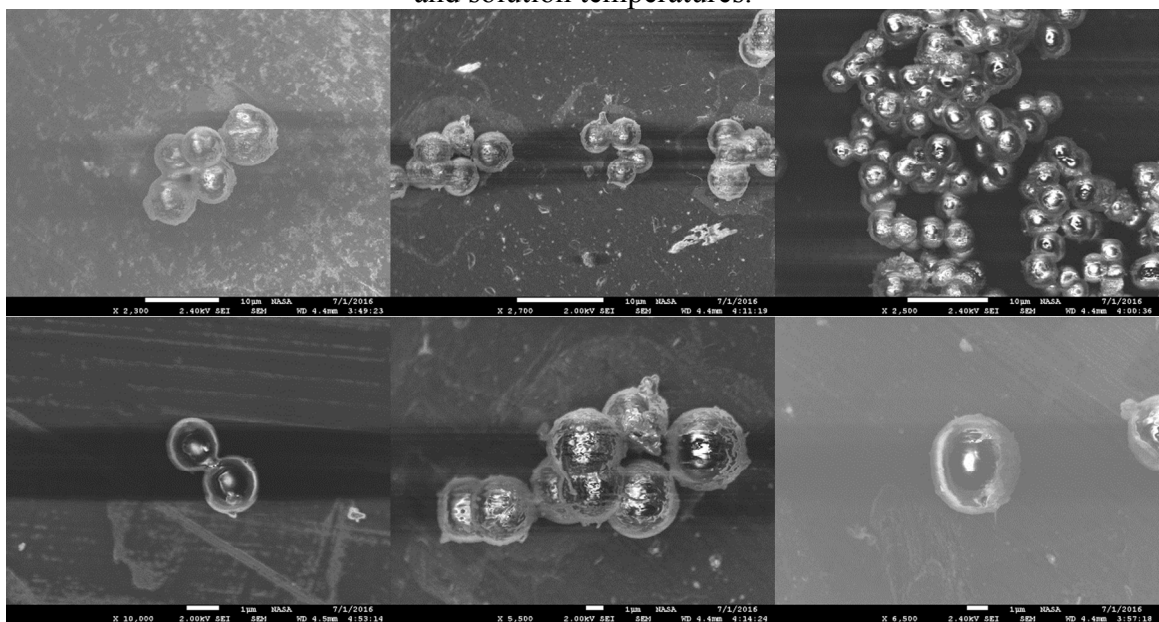

**SI Figure 3.** SEM images of particles synthesized containing BHT (top) and Piper (bottom).

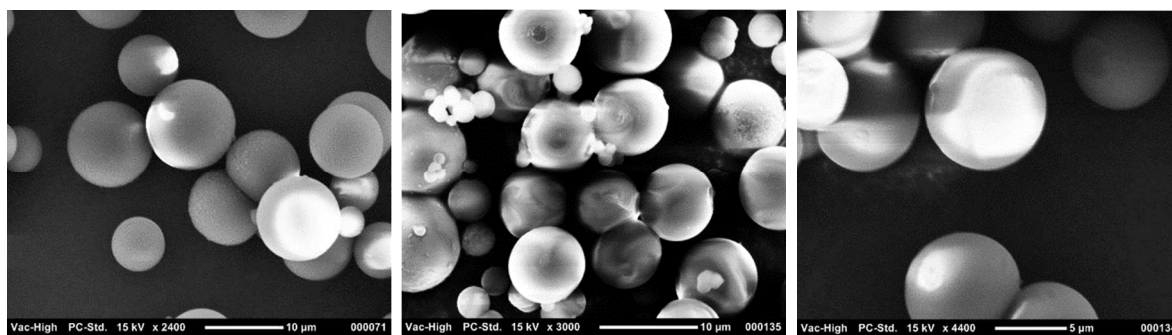

**SI Figure 4.** SEM images of microparticles made from TEA (left), HPED (middle) and DEA (right).

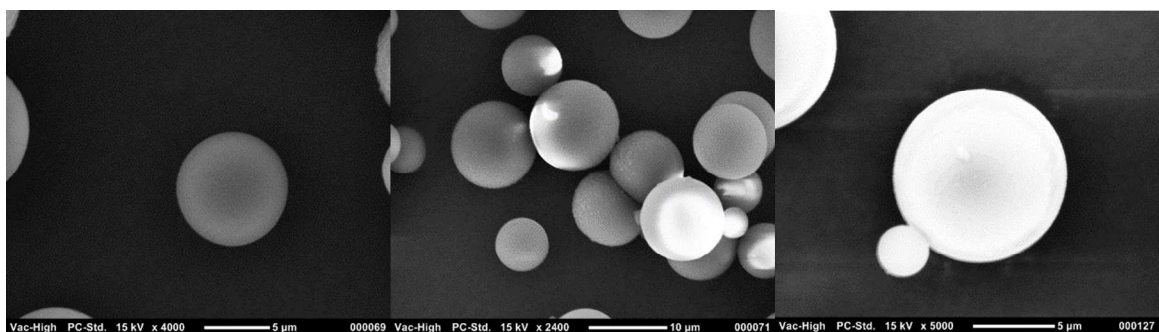

**SI Figure 5.** SEM images of particles synthesized from IPDI and TEA at 20°C.

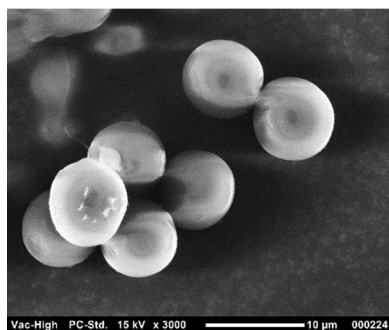

**SI Figure 6.** SEM images of particles synthesized from IPDI and TEA 0°C

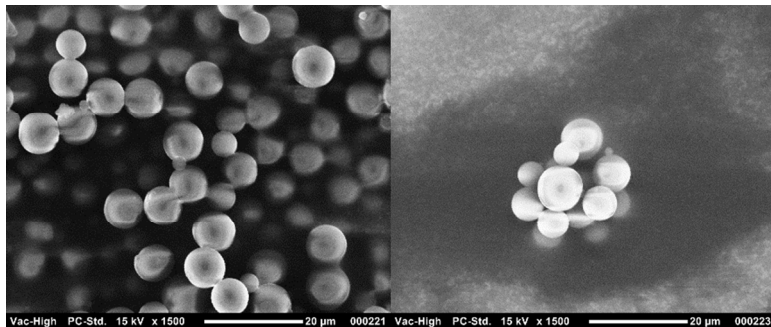

**SI Figure 7.** SEM images of particles synthesized from IPDI and TEA at 80°C

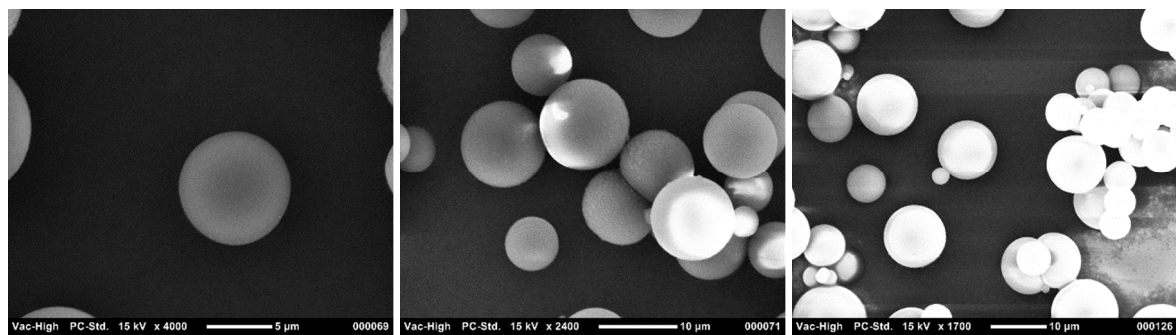

**SI Figure 8.** SEM images of particles synthesized from IPDI and TEA at 65°C

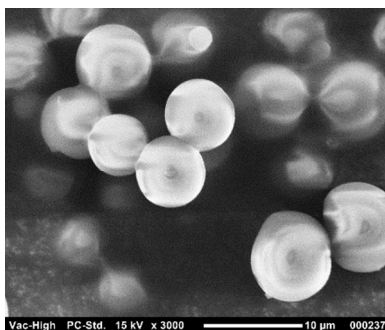

**SI Figure 9.** SEM image of particles synthesized from IPDI and TEA, 60% acetone

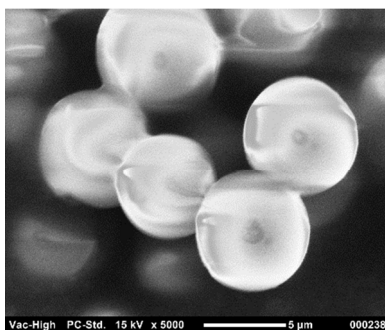

**SI Figure 10.** SEM image of particles synthesized from IPDI and TEA 50% acetone

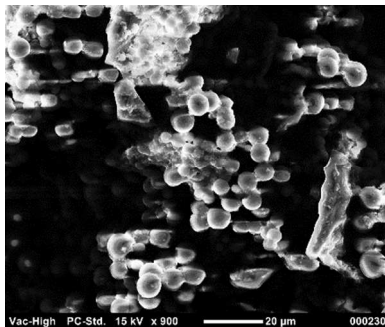

**SI Figure 11.** SEM image of particles synthesized from IPDI and TEA 30% acetone

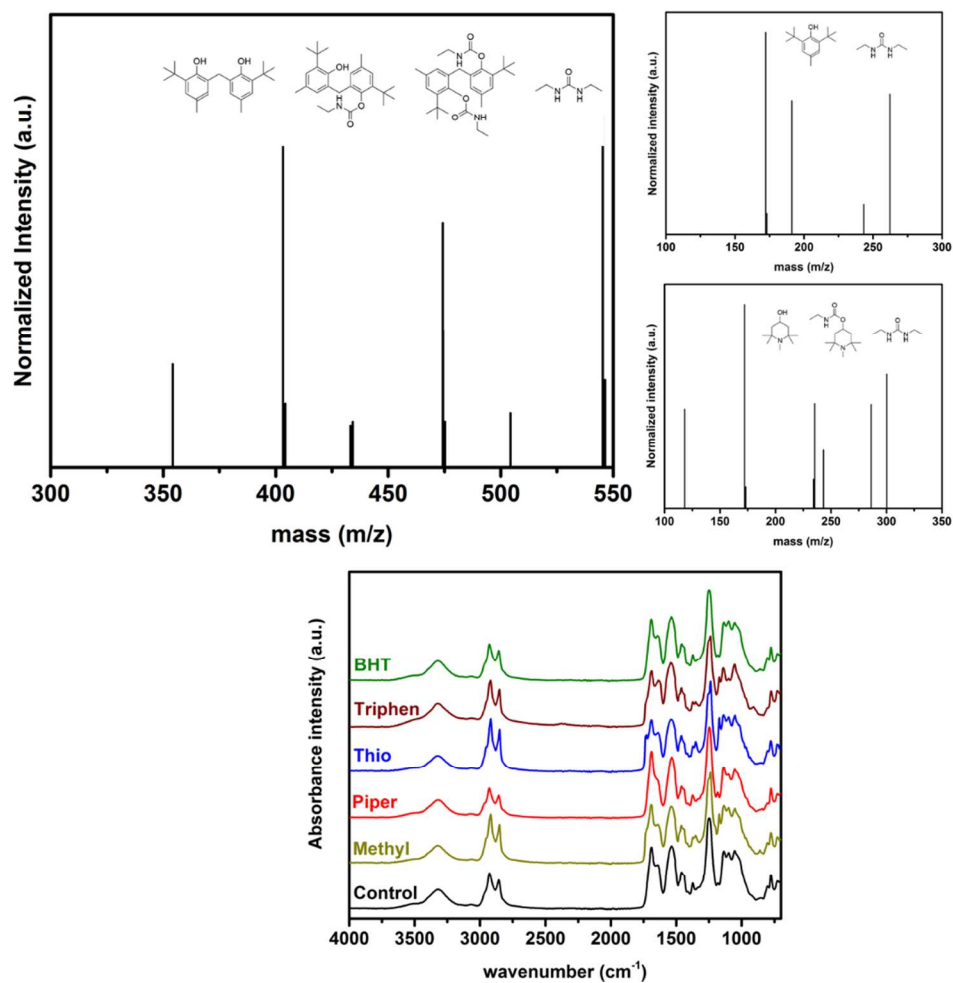

**SI Figure 12.** Spectroscopic analysis of the antioxidant reactions with isocyanates using model compounds BHT, Methyl and Piper (top), and FTIR-ATR of the antioxidant-containing SMPs (bottom).



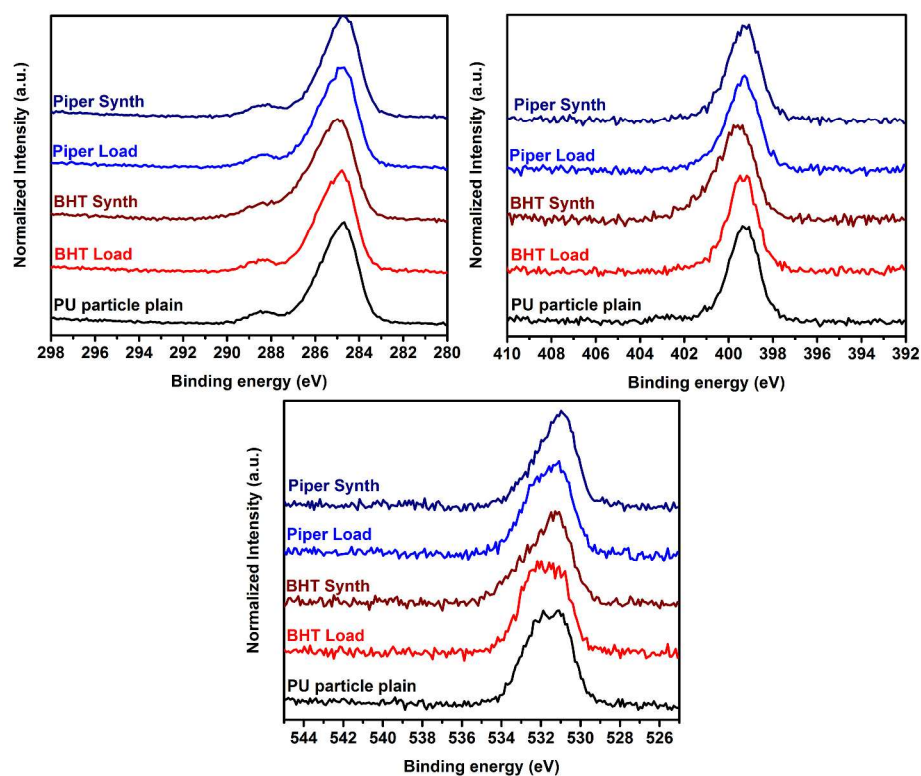

**SI Figure 13.** XPS spectra of example particles comparing the effects of loading during synthesis compared with post synthesis of Piper and BHT antioxidants. (C1s (298-280 eV), N1s (410-392 eV), O1s (545-525 eV)).



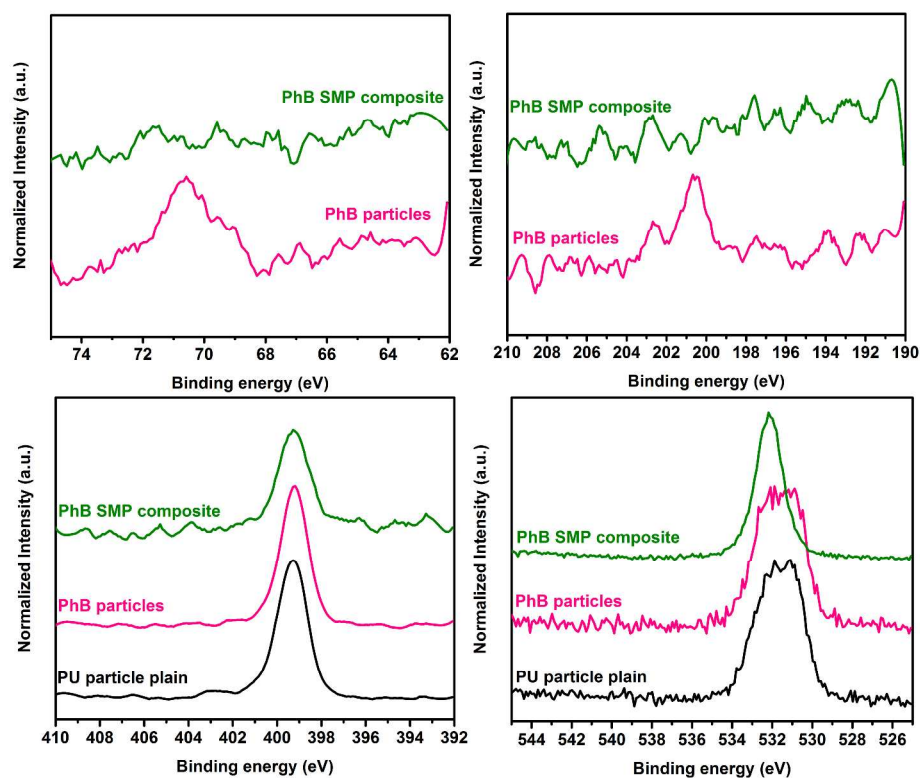

**SI Figure 14.** XPS spectra of Br3p (75-62 eV), Cl2s (210-190 eV), N1s (410-392 eV), O1s (545-525 eV) for PhB-containing SMPs and particles.

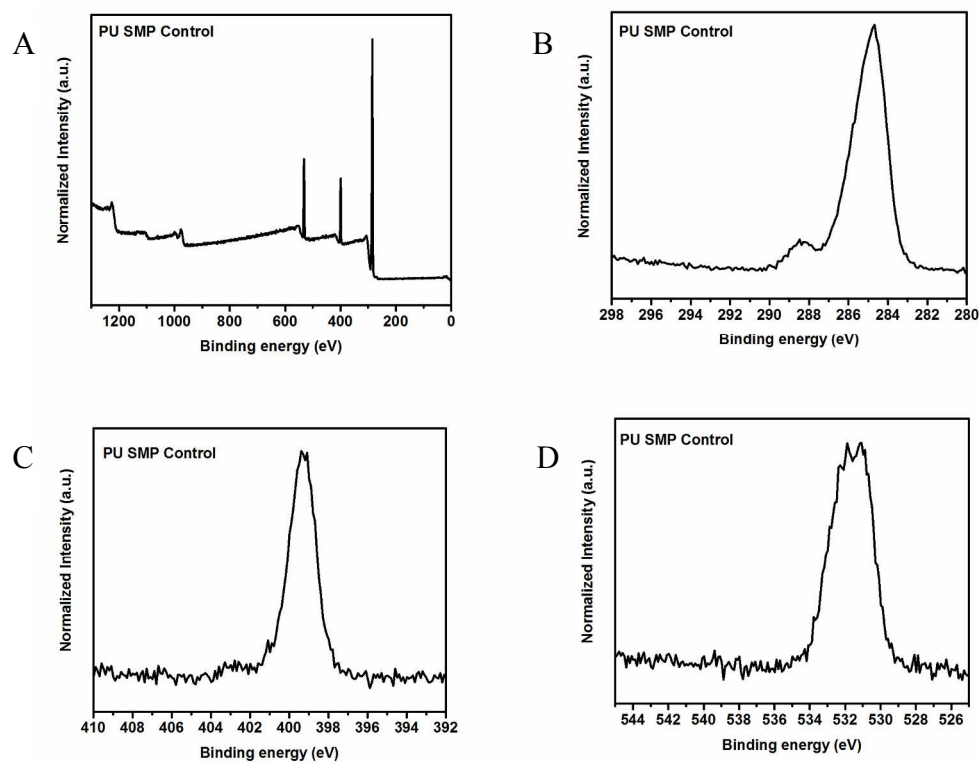

**SI Figure 15.** XPS spectra displaying control SMP formulations, displaying the survey scan (A) and specific elemental scans (C1s (298-280 eV, B), N1s (410-392 eV, C), O1s (545-525 eV, D)).

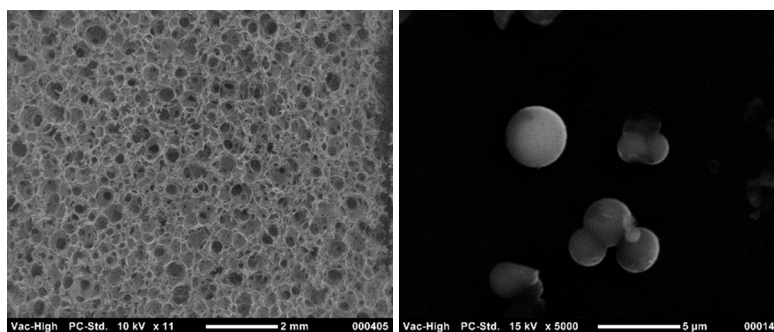

**SI Figure 16.** SEM image of Nile particle SMP composite of foam pores containing microparticles in struts (left), and individual particles (right).

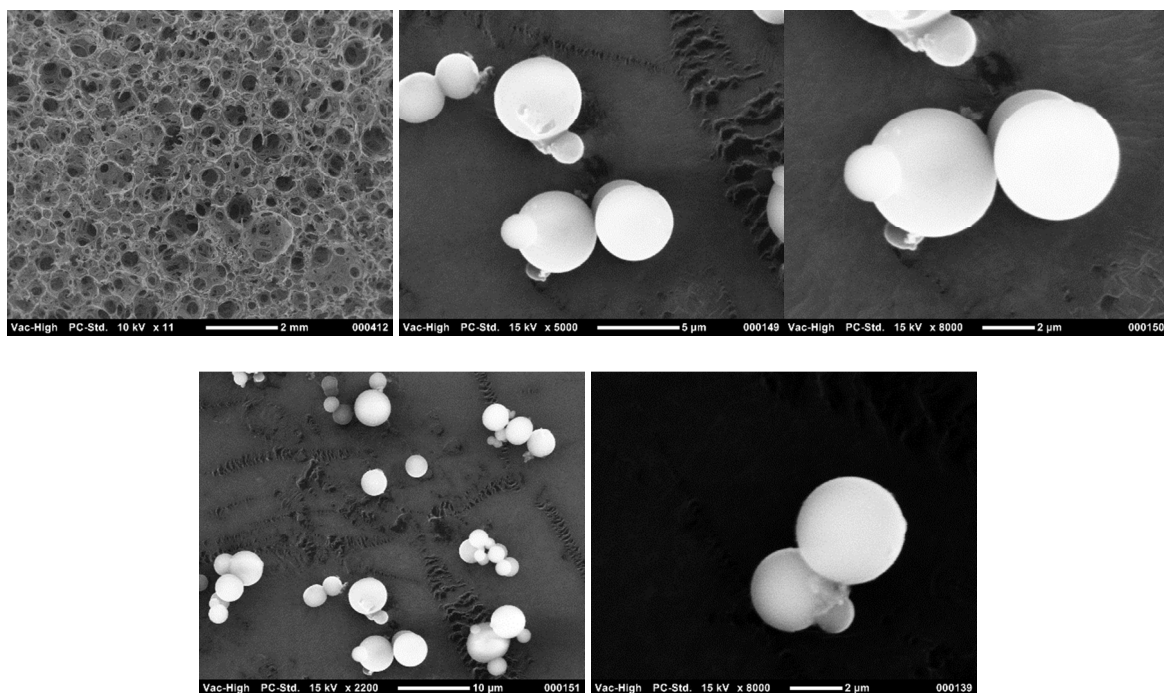

**SI Figure 17.** SEM image of PhB particle SMP composite (top left) and SEM images of particles (top center, top right, and bottom).

**SI Table 1. Mechanical properties of small molecule antioxidant-containing SMPs using HDI and 60% TEA/40% HPED alcohol ratio; all samples were tested at room temperature at 5 mm/min for ASTM Type IV dogbones.**

| <i>Foam Composition</i> | <i>Elastic Modulus (MPa)</i> | <i>Strain-to-Failure (%)</i> | <i>Tensile Strength (MPa)</i> | <i>Toughness (<math>J \cdot m^{-4}</math>)</i> |
|-------------------------|------------------------------|------------------------------|-------------------------------|------------------------------------------------|
| <i>Control</i>          | $0.25 \pm 0.06$              | $165 \pm 21$                 | $0.41 \pm 0.08$               | 333.1                                          |
| <i>Piper</i>            | $0.28 \pm 0.19$              | $167 \pm 27$                 | $0.61 \pm 0.23$               | 786.9                                          |
| <i>Methyl</i>           | $2.32 \pm 0.44$              | $104 \pm 27$                 | $1.77 \pm 0.46$               | 1263.8                                         |
| <i>BHT</i>              | $0.24 \pm 0.06$              | $176 \pm 39$                 | $0.97 \pm 0.14$               | 940.1                                          |
| <i>Thio</i>             | $0.24 \pm 0.06$              | $181 \pm 49$                 | $0.81 \pm 0.21$               | 722.6                                          |
| <i>Triphen</i>          | $0.11 \pm 0.02$              | $131 \pm 21$                 | $0.35 \pm 0.06$               | 204.5                                          |

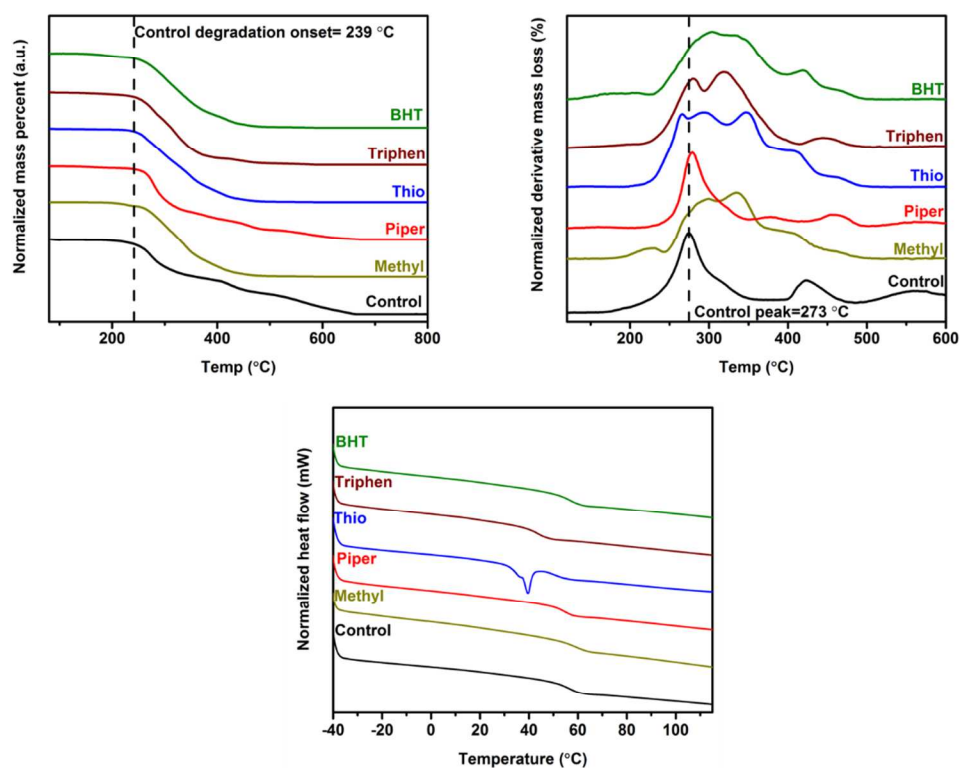

**SI Figure 18.** Thermal analysis of antioxidant-containing foams, displaying TGA (top) and DSC (below) thermograms. BHT, Piper, Thio, and Methyl seemed to delay thermal oxidation; after extractions, Thio still appeared to be in the SMP matrix, as did Methyl, Piper, and BHT (Triphen seemed to have been extracted out).

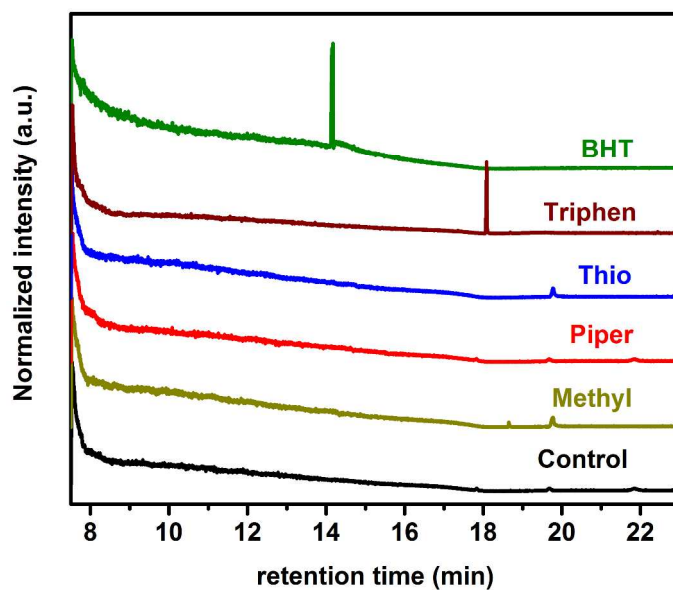

**SI Figure 19.** GCMS chromatographs for antioxidants extracted from SMPs.

**SI Table 2.** Mass and concentration of antioxidants added during synthesis and extracted during cleaning, determined using GC/MS.

|         | Additive Mass<br>(g) | Additive Concentration<br>(mol) | Extract Mass<br>(g) | Extract Concentration<br>(mol) |
|---------|----------------------|---------------------------------|---------------------|--------------------------------|
| Piper   | 2.000                | 0.012                           | 0.080               | 0.000                          |
| Methyl  | 2.000                | 0.006                           | 0.155               | 0.000                          |
| Thio    | 2.000                | 0.004                           | 0.149               | 0.000                          |
| Triphen | 2.000                | 0.007                           | 1.928               | 0.006                          |
| BHT     | 2.000                | 0.009                           | 1.629               | 0.007                          |

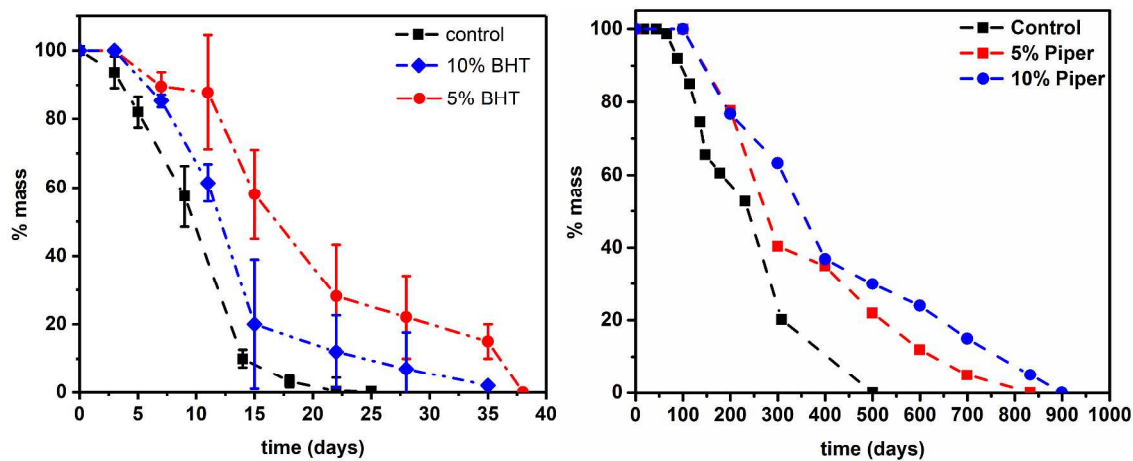

**SI Figure 20. Accelerated oxidation of TMHDI SMPs containing BHT (left) and predicted real time oxidative mass loss of antioxidant (Piper) containing HDI-based SMPs (equivalent of 2%  $\text{H}_2\text{O}_2$  at 37°C).**
